# Supplementary material for: Population Pharmacokinetic Analysis of Dexmedetomidine in Children using Real World Data from Electronic Health Records and Remnant Specimens
Source: bioRxiv or medRxiv preprint supplement (doi:10.1101/2021.05.03.21256553), 2021-11-03
Supplement: Supplementary file [file media-1.pdf]

## Supplemental Tables

**Table S1. Population Pharmacokinetic parameter estimates from weight and *UGT1A4* models without age.** Weight is modeled with fixed allometric scaling parameters.

| <i>UGT1A4</i> dichotomous model                            |                                              | <i>UGT1A4</i> additive model                        |                                              |
|------------------------------------------------------------|----------------------------------------------|-----------------------------------------------------|----------------------------------------------|
| Parameters<br>(Obj = -1927.30)                             | Estimates (SE)<br>[95% CI]                   | Parameters<br>(Obj = -1929.81)                      | Estimates (SE)<br>[95% CI]                   |
| $CL = \theta_1(WT/70)^{0.75} \exp(\theta_6 I[UGT1A4 > 0])$ |                                              | $CL = \theta_1(WT/70)^{0.75} \exp(\theta_6 UGT1A4)$ |                                              |
| $\theta_1$                                                 | 18.7 (1.96)<br>[15.3, 23]                    | $\theta_1$                                          | 23.2 (2.48)<br>[18.9, 28.6]                  |
| $\theta_6$                                                 | -0.142 (0.103)<br>[-0.344, 0.0589]           | $\theta_6$                                          | -0.167 (0.0869)<br>[-0.338, 0.00294]         |
| $V_1 = \theta_2(WT/70)$                                    |                                              | $V_1 = \theta_2(WT/70)$                             |                                              |
| $\theta_2$                                                 | 134 (11.4)<br>[113, 158]                     | $\theta_2$                                          | 130 (11.9)<br>[109, 155]                     |
| $Q = \theta_3(WT/70)^{0.75}$                               |                                              | $Q = \theta_3(WT/70)^{0.75}$                        |                                              |
| $\theta_3$                                                 | 29.6 (2.25)<br>[25.5, 34.3]                  | $\theta_3$                                          | 26.4 (2.35)<br>[22.2, 31.4]                  |
| $V_2 = \theta_4(WT/70)$                                    |                                              | $V_2 = \theta_4(WT/70)$                             |                                              |
| $\theta_4$                                                 | 10600 (2240)<br>[7100, 15900]                | $\theta_4$                                          | 8500 (1770) [5720,<br>12600]                 |
| $\omega_{CL}$ (%CV)                                        | 131 (14) [106,<br>160]                       | $\omega_{CL}$ (%CV)                                 | 117 (14) [92, 147]                           |
| $\omega_{V_1}$ (%CV)                                       | 152 (17) [122,<br>189]                       | $\omega_{V_1}$ (%CV)                                | 155 (22) [117, 204]                          |
| $\omega_Q$ (%CV)                                           | 77 (10) [59, 97]                             | $\omega_Q$ (%CV)                                    | 93 (12) [72, 118]                            |
| $\omega_{V_2}$ (%CV)                                       | 1277 (404) [711,<br>2461]                    | $\omega_{V_2}$ (%CV)                                | 712 (206) [417,<br>1299]                     |
| $\sigma_{add}$ (ng/mL)                                     | 2.09e-07 (6.68e-06)<br>[-1.29e-05, 1.33e-05] | $\sigma_{add}$ (ng/mL)                              | 3.66e-08 (1.74e-06)<br>[-3.37e-06, 3.44e-06] |
| $\sigma_{prop}$ (ng/mL)                                    | 0.477 (0.0133)<br>[0.451, 0.503]             | $\sigma_{prop}$ (ng/mL)                             | 0.481 (0.0136)<br>[0.455, 0.508]             |

**Table S2. Population Pharmacokinetic parameter estimates from weight and *UGT2B10* models without age.** Weight is modeled with fixed allometric scaling parameters.

| <i>UGT2B10</i> dichotomous model                            |                                     | <i>UGT2B10</i> additive model                        |                                           |
|-------------------------------------------------------------|-------------------------------------|------------------------------------------------------|-------------------------------------------|
| Parameters<br>(Obj = -1930.53)                              | Estimates (SE)<br>[95% CI]          | Parameters<br>(Obj = -1935.79)                       | Estimates (SE)<br>[95% CI]                |
| $CL = \theta_1(WT/70)^{0.75} \exp(\theta_6 I[UGT2B10 > 0])$ |                                     | $CL = \theta_1(WT/70)^{0.75} \exp(\theta_6 UGT2B10)$ |                                           |
| $\theta_1$                                                  | 18 (2.72)<br>[13.4, 24.1]           | $\theta_1$                                           | 20.5 (2.94)<br>[15.5, 27]                 |
| $\theta_6$                                                  | -0.208 (0.111)<br>[-0.426, 0.00898] | $\theta_6$                                           | -0.196 (0.0985)<br>[-0.389, -0.00259]     |
| $V_1 = \theta_2(WT/70)$                                     |                                     | $V_1 = \theta_2(WT/70)$                              |                                           |
| $\theta_2$                                                  | 140 (12.2)<br>[118, 166]            | $\theta_2$                                           | 134 (11.4)<br>[114, 158]                  |
| $Q = \theta_3(WT/70)^{0.75}$                                |                                     | $Q = \theta_3(WT/70)^{0.75}$                         |                                           |
| $\theta_3$                                                  | 32.9 (3.63)<br>[26.6, 40.8]         | $\theta_3$                                           | 31.4 (2.45)<br>[27, 36.5]                 |
| $V_2 = \theta_4(WT/70)$                                     |                                     | $V_2 = \theta_4(WT/70)$                              |                                           |
| $\theta_4$                                                  | 12700 (3390)<br>[7700, 20900]       | $\theta_4$                                           | 10900 (2100)<br>[7530, 15700]             |
| $\omega_{CL}$ (%CV)                                         | 156 (21) [120, 203]                 | $\omega_{CL}$ (%CV)                                  | 145 (33) [92, 226]                        |
| $\omega_{V_1}$ (%CV)                                        | 150 (18) [117, 191]                 | $\omega_{V_1}$ (%CV)                                 | 146 (19) [113, 189]                       |
| $\omega_Q$ (%CV)                                            | 68 (13) [45, 97]                    | $\omega_Q$ (%CV)                                     | 76 (9) [59, 94]                           |
| $\omega_{V_2}$ (%CV)                                        | 1136 (434) [565, 2538]              | $\omega_{V_2}$ (%CV)                                 | 789 (215) [476, 1389]                     |
| $\sigma_{add}$ (ng/mL)                                      | 3.39e-07 (*)                        | $\sigma_{add}$ (ng/mL)                               | 3.66e-08 (4.91e-07) [-9.26e-07, 9.99e-07] |
| $\sigma_{prop}$ (ng/mL)                                     | 0.473 (0.0132) [0.447, 0.499]       | $\sigma_{prop}$ (ng/mL)                              | 0.475 (0.0134) [0.449, 0.501]             |

\* Standard error could not be estimated

## Supplemental Figures

**Figure S1. Predicted clearance by weight for selected ages for *UGT1A4* model.** Plausible weight ranges for each age group are: 6 months (5 - 12 kg), 12 months (6 - 13 kg), 24 months (8 - 16 kg), 48 months (12 - 22 kg), 72 months (15 - 28 kg), 90 months (18 - 35 kg), 120 months (23 - 50 kg). Overlapping lines between different age categories represent weights that are plausible for multiple ages.

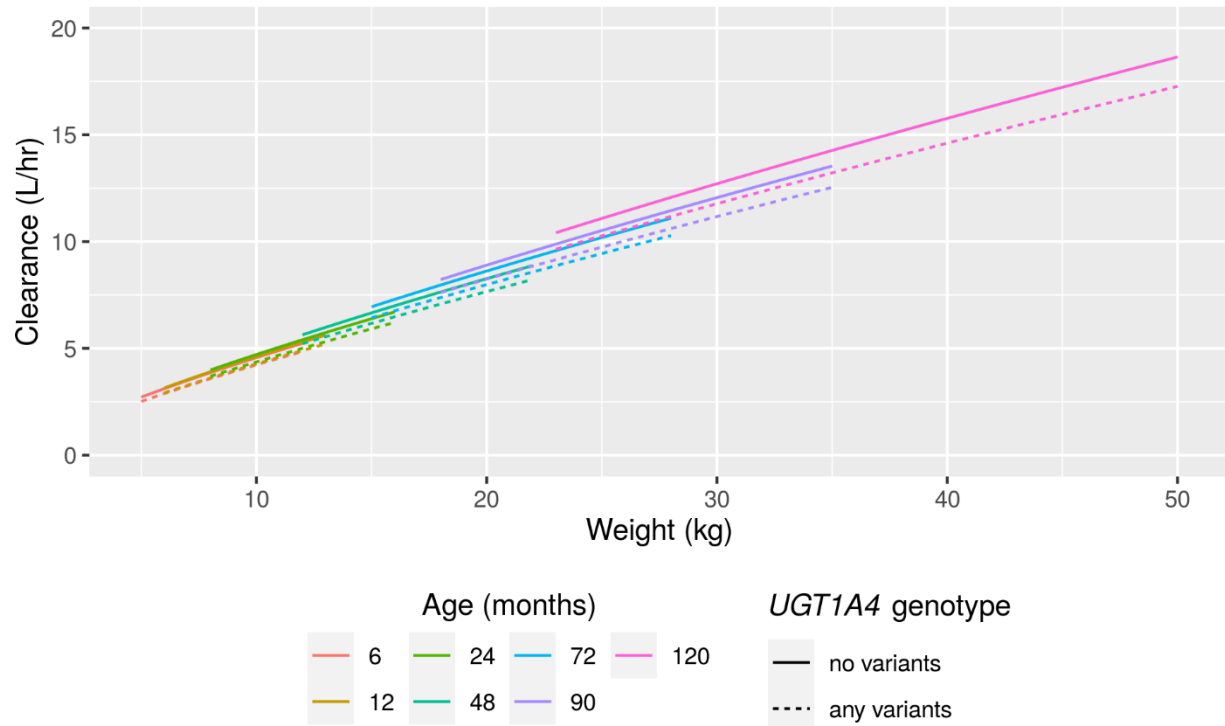

### Calculation of genotype effect in terms of equivalent change in weight

From the final model average  $CL = \theta_1 \times \left(\frac{WT_i}{70}\right)^{0.75} \times \exp(\theta_5 \times AGE_i + \theta_6)$  for a subject with a *UGT2B10* variant. A subject with the equivalent age, no variants, and weight reduced by factor  $\Delta$  will have average  $CL = \theta_1 \times \left(\frac{WT_i \times \Delta}{70}\right)^{0.75} \times \exp(\theta_5 \times AGE_i)$ . Setting these two equations equal and solving for  $\Delta$  will give the proportional weight change that has the same impact on CL as having a genotype variant

$$\theta_1 \times \left(\frac{WT_i}{70}\right)^{0.75} \times \exp(\theta_5 \times AGE_i + \theta_6) = \theta_1 \times \left(\frac{WT_i \times \Delta}{70}\right)^{0.75} \times \exp(\theta_5 \times AGE_i)$$

$$\left(\frac{WT_i}{70}\right)^{0.75} \times \exp(\theta_5 \times AGE_i) \times \exp(\theta_6) = \left(\frac{WT_i}{70}\right)^{0.75} \times \Delta^{0.75} \times \exp(\theta_5 \times AGE_i)$$

$$\exp(\theta_6) = \Delta^{0.75}$$

$$\theta_6 = 0.75 \log(\Delta)$$

$$\exp\left(\frac{\theta_6}{0.75}\right) = \Delta$$

For the final *UGT2B10* model  $\theta_6 = -0.15$ , so the equivalent proportional weight reduction is

$$\Delta = \exp\left(\frac{-0.15}{0.75}\right) \approx 0.81$$
